# Supplementary material for: Optimizing course assignment in higher education using natural language processing and semantic similarity
Source: PeerJ journal article supplement (doi:10.7717/peerj-cs.3557), 2026-02-04
Supplement: Codebook.xlsx [file Codebook.xlsx]

## Sheet: Dataset
Codes for Dataset
id	name	document	Description
1 to 47	course name	course contents and requirements	Details of the Computer science courses
48 to 94	course name	course contents and requirements	Details of the Information technology degree courses
95 to 141	course name	course contents and requirements	Details of the Telecommunications degree courses
142 to 188	course name	course contents and requirements	Details of the Software engineering degree courses
189 to 230	course name	course contents and requirements	Details of the Information Systems degree courses
231 to 252	course name	course contents and requirements	Details of the Courses that are not part of the Faculty of Computer Science
253 to 287	Instructor code	Training instructors data	Training certificate information
288 to 322	Instructor code	Instructor experience data	Details of the experience
323 to 357	Instructor code	Data from publications made by the instructor	Title, keywords and summary of articles

## Sheet: Instructor
Codes for the instructor columns
Code	Name
0	ALCIVAR CEVALLOS ROBERTH ABEL
1	BOWEN MENDOZA LORENA ELIZABETH
2	CEDENO PALMA EMILIO ANTONIO
3	CHANCAY GARCIA LEONARDO JAVIER
4	COBENA MACIAS TATIANA ELIZABETH
5	COTERA RAMIREZ GABRIEL AGUSTIN
6	CRUZ FELIPE MARELY DEL ROSARIO
7	CUZCO TORRES JAVIER ENRIQUE
8	DEMERA CENTENO VIVIANA BELEN
9	DEMERA URETA GABRIEL PRIMITIVO
10	FLORES CEDENO PABLO RAMON
11	GARCIA BERMUDEZ RODOLFO VALENTIN
12	LOOR NAVIA EDDY ALEJANDRO
13	LOOR ZAMORA DARWIN PATRICIO
14	MERO RAMIREZ KEVIN MICHAEL
15	MEZA HORMAZA JAIME ALCIDES
16	ORDONEZ AVILA ERMENSON RICARDO
17	OYARZUN ALAVA LUIS NIBALDO
18	PARRAGA ALAVA JORGE ANTONIO
19	PARRAGA VALLE JOSE EDUARDO
20	PINARGOTE NAVARRETE CARLOS LUIS
21	PINARGOTE ORTEGA JENMER MARICELA
22	RODRIGUEZ VELIZ MIGUEL JOSEPH
23	SAN ANDRES LAZ ESTHELA MARIA
24	SANTANA CAMPOVERDE FABRICIO JAVIER
25	TOALA DUENAS RAMON ALFREDO
26	TORRES MORAN CHRISTIAN RONALD
27	VACA CARDENAS LETICIA AZUCENA
28	VARGAS NOLIVOS HERNAN PATRICIO
29	VELIZ BRIONES VICENTE FELIX
30	VELOZ ZAMBRANO JORGE LUIS
31	ZAMBRANO MONTENEGRO DAVID FERNANDO
32	ZAMBRANO ROMERO WALTER DANIEL
33	ZAMBRANO SOLORZANO ELBA TATIANA
34	ZAMBRANO ZAMBRANO DANNYLL MICHELLC

## Sheet: Course
Codes for the couse columns
id	course name
0	Algorithm analysis and design
1	Database administration
2	Linear algebra
3	Algorithms and data structures
4	Systems analysis and design
5	Distributed architecture and services
6	Databases
7	Multivariate calculus
8	Variable calculus
9	Parallel and distributed computing
10	Computing society
11	Communication and language
12	Information technology control and auditing
13	Platform-based development
14	Information systems development
15	Curriculum integration development
16	Entrepreneurship and innovation
17	Statistics
18	Information systems management and acquisition strategy
19	Curriculum integration formulation
20	Information systems fundamentals
21	Business process and enterprise systems management
22	Information systems project management
23	Software engineering fundamentals
24	Information technology risk and security management
25	Information technology infrastructure
26	Software engineering
27	Artificial intelligence
28	Business intelligence
29	Business application user interfaces
30	Introduction to research Scientific
31	Introduction to programming
32	Dicrete mathematics
33	Data mining
34	New technologies and innovation in information systems
35	Objects and data abstraction
36	Object-oriented programming
37	Advanced programming
38	Socioeconomic, cultural, and ecological reality of Ecuador
39	Networks and communication
40	Management information systems
41	Operating systems

## Sheet: Scale
Codes for the scale columns
scale	description
1	First option
2	Second option
3	Third option

## Sheet: Selection
Codes for the selection columns
0	Not selected
1	Selected
